# Supplementary material for: The Relationship between Personality Traits and COVID-19 Anxiety: A Mediating Model
Source: MDPI journal article supplement (doi:10.3390/bs12020024), 2022-01-26
Supplement: s1 [file s1]

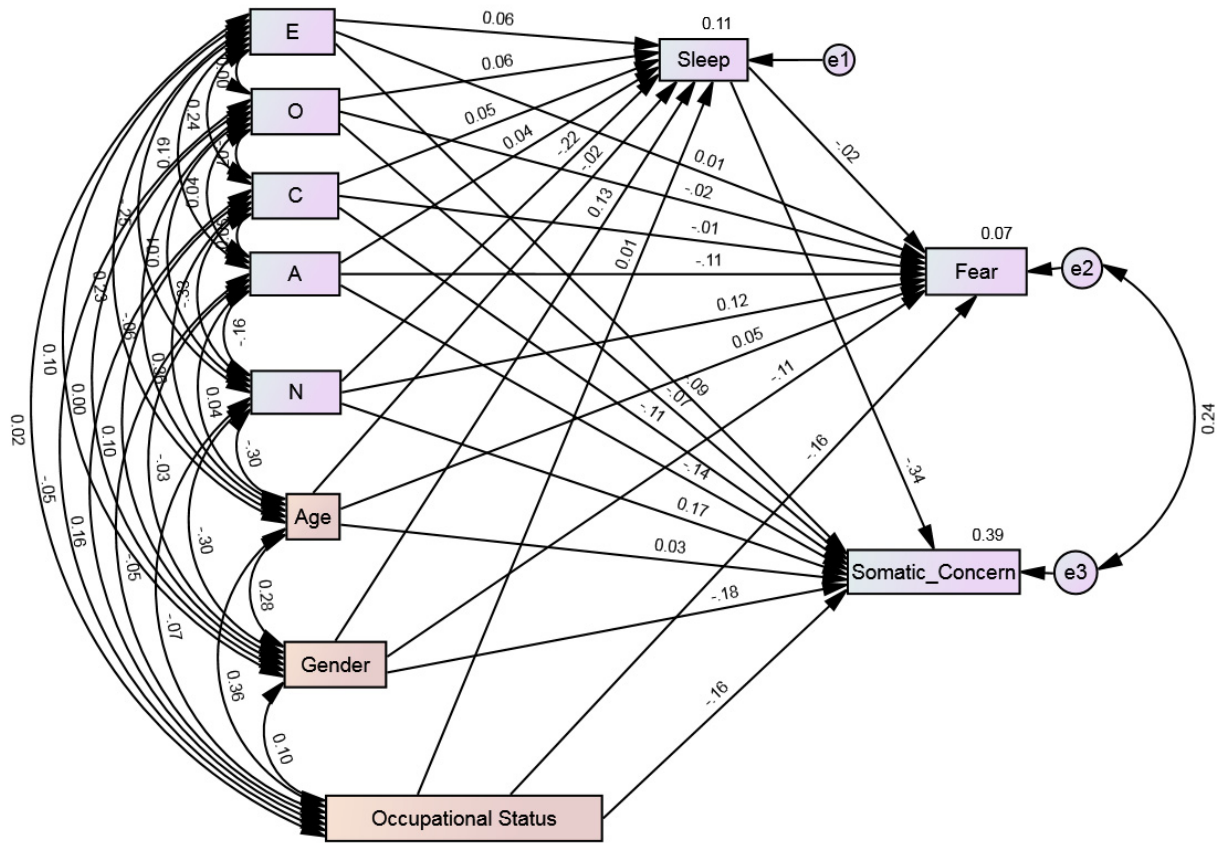

**Figure S1.** Results of mediation path analysis (Model M1) showing the relationship among the Big Five personality domains (E = Extraversion, O: Openness, C: Conscientiousness, A: Agreeableness, N: Neuroticism) and COVID 19 anxiety components (Fear and Somatic Concern).

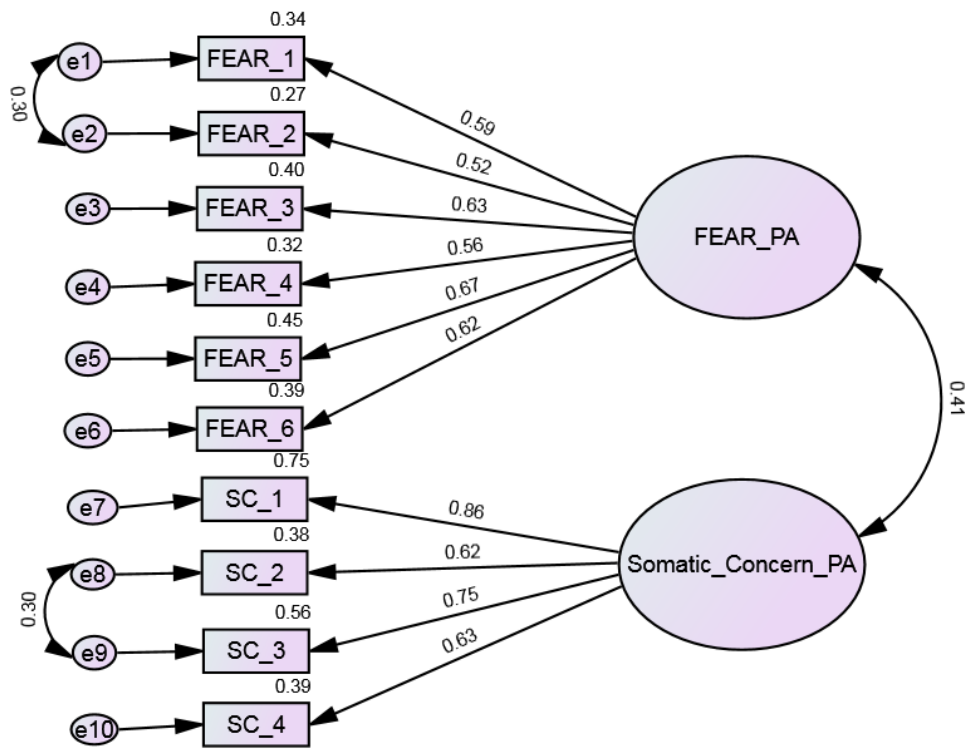

**Figure S2.** Confirmatory Factor analysis (N=296) for the two factor COVID 19 pandemic anxiety scale ( $\chi^2 = 70.415$ , CMIN/DF=2.200, RMSEA: 0.064, GFI: 0.958, CFI: 0.957, TLI: 0.939, SRMR: 0.0534).
