# Supplementary material for: The Relationship between Personality Traits and COVID-19 Anxiety: A Mediating Model
Source: MDPI journal article supplement (doi:10.3390/bs12020024), 2022-01-26
Supplement: s1 [file s1]

**Table S1.** Herman single factor test results

| Factor | Initial Eigenvalues |               |              | Extraction Sums of Squared Loadings |               |              |
|--------|---------------------|---------------|--------------|-------------------------------------|---------------|--------------|
|        | Total               | % of Variance | Cumulative % | Total                               | % of Variance | Cumulative % |
| 1      | 4.387               | 20.889        | 20.889       | 3.681                               | 17.528        | 17.528       |
| 2      | 2.388               | 11.370        | 32.259       |                                     |               |              |
| 3      | 1.515               | 7.215         | 39.475       |                                     |               |              |
| 4      | 1.294               | 6.164         | 45.639       |                                     |               |              |
| 5      | 1.238               | 5.895         | 51.534       |                                     |               |              |
| 6      | 1.108               | 5.276         | 56.810       |                                     |               |              |
| 7      | 1.020               | 4.857         | 61.667       |                                     |               |              |
| 8      | 0.897               | 4.273         | 65.939       |                                     |               |              |
| 9      | 0.833               | 3.969         | 69.908       |                                     |               |              |
| 10     | 0.769               | 3.661         | 73.569       |                                     |               |              |
| 11     | 0.758               | 3.611         | 77.180       |                                     |               |              |
| 12     | 0.684               | 3.257         | 80.437       |                                     |               |              |
| 13     | 0.620               | 2.953         | 83.390       |                                     |               |              |
| 14     | 0.603               | 2.871         | 86.261       |                                     |               |              |
| 15     | 0.557               | 2.654         | 88.915       |                                     |               |              |
| 16     | 0.486               | 2.312         | 91.227       |                                     |               |              |
| 17     | 0.443               | 2.111         | 93.338       |                                     |               |              |
| 18     | 0.433               | 2.062         | 95.400       |                                     |               |              |
| 19     | 0.377               | 1.793         | 97.194       |                                     |               |              |
| 20     | 0.322               | 1.534         | 98.728       |                                     |               |              |
| 21     | 0.267               | 1.272         | 100.000      |                                     |               |              |

Note: Extraction Method: Principal Axis Factoring

**Table S2.** Assessment of normality (N=296)

| Variable        | min    | max    | skew   | c.r    | kurtosis | c.r    |
|-----------------|--------|--------|--------|--------|----------|--------|
| Age             | 18.000 | 77.000 | 0.864  | 6.069  | -0.333   | -1.169 |
| Gender          | 0.000  | 1.000  | 0.487  | 1.916  | -1.763   | -6.762 |
| Occupation      | 0.000  | 1.000  | 0.273  | 3.419  | -1.926   | -6.192 |
| E               | 2.000  | 10.000 | -0.133 | -0.931 | -0.87    | -3.057 |
| O               | 3.000  | 10.000 | 0.200  | 1.404  | -0.105   | -0.367 |
| C               | 3.000  | 10.000 | 0.010  | 0.072  | -0.635   | -2.232 |
| A               | 2.000  | 10.000 | -0.538 | -3.781 | -0.15    | -0.525 |
| N               | 2.000  | 10.000 | -0.062 | -0.438 | -0.688   | -2.415 |
| Sleep           | 0.000  | 10.000 | -0.770 | -5.409 | 0.08     | 0.283  |
| Fear            | 0.000  | 18.000 | 0.477  | 3.35   | -0.073   | -0.258 |
| Somatic_Concern | 0.000  | 11.000 | 1.239  | 8.702  | 0.881    | 3.094  |
| Multivariate    |        |        |        |        | -2.892   | -1.471 |

**Table S3.** Standardized total effects for Model 1

| lower bounds (BC)                                         |        |        |            |        |        |        |        |        |        |
|-----------------------------------------------------------|--------|--------|------------|--------|--------|--------|--------|--------|--------|
|                                                           | Age    | Gender | Occupation | O      | E      | C      | N      | A      | Sleep  |
| Sleep                                                     | -0.135 | 0.035  | -0.112     | -0.058 | -0.058 | -0.084 | -0.337 | -0.074 | 0.000  |
| Fear                                                      | -0.068 | -0.228 | -0.277     | -0.163 | -0.102 | -0.130 | -0.003 | -0.215 | -0.141 |
| Somatic_Concern                                           | -0.076 | -0.307 | -0.250     | -0.194 | -0.209 | -0.234 | 0.131  | -0.262 | -0.443 |
| upper bounds (BC)                                         |        |        |            |        |        |        |        |        |        |
|                                                           | Age    | Gender | Occupation | O      | E      | C      | N      | A      | Sleep  |
| Sleep                                                     | 0.114  | 0.248  | 0.115      | 0.167  | 0.201  | 0.174  | -0.105 | 0.142  | 0.000  |
| Fear                                                      | 0.170  | 0.004  | -0.051     | 0.088  | 0.130  | 0.109  | 0.236  | 0.010  | 0.121  |
| Somatic_Concern                                           | 0.134  | -0.136 | -0.060     | 0.011  | 0.009  | -0.011 | 0.361  | -0.051 | -0.232 |
| Standardized total effects - two tailed significance (BC) |        |        |            |        |        |        |        |        |        |
|                                                           | Age    | Gender | Occupation | O      | E      | C      | N      | A      | Sleep  |
| Sleep                                                     | 0.854  | 0.005  | 0.908      | 0.368  | 0.304  | 0.407  | 0.002  | 0.548  | ...    |
| Fear                                                      | 0.471  | 0.061  | 0.011      | 0.608  | 0.791  | 0.813  | 0.055  | 0.065  | 0.765  |
| Somatic_Concern                                           | 0.480  | 0.002  | 0.006      | 0.083  | 0.068  | 0.029  | 0.001  | 0.003  | 0.003  |

**Table S4.** Standardized direct effects for Model 1

| lower bounds (BC)                                                      |        |        |            |        |        |        |        |        |        |
|------------------------------------------------------------------------|--------|--------|------------|--------|--------|--------|--------|--------|--------|
|                                                                        | Age    | Gender | Occupation | O      | E      | C      | N      | A      | Sleep  |
| Sleep                                                                  | -0.135 | 0.035  | -0.112     | -0.058 | -0.058 | -0.084 | -0.337 | -0.074 | 0.000  |
| Fear                                                                   | -0.070 | -0.225 | -0.275     | -0.157 | -0.096 | -0.130 | -0.010 | -0.213 | -0.141 |
| Somatic_Concern                                                        | -0.066 | -0.265 | -0.242     | -0.172 | -0.181 | -0.214 | 0.057  | -0.245 | -0.443 |
| upper bounds (BC)                                                      |        |        |            |        |        |        |        |        |        |
|                                                                        | Age    | Gender | Occupation | O      | E      | C      | N      | A      | Sleep  |
| Sleep                                                                  | 0.114  | 0.248  | 0.115      | 0.167  | 0.201  | 0.174  | -0.105 | 0.142  | 0.000  |
| Fear                                                                   | 0.170  | 0.007  | -0.049     | 0.088  | 0.136  | 0.117  | 0.232  | 0.011  | 0.121  |
| Somatic_Concern                                                        | 0.123  | -0.098 | -0.060     | 0.023  | 0.021  | 0.007  | 0.289  | -0.050 | -0.232 |
| Standardized direct effects for Model 1 - two tailed significance (BC) |        |        |            |        |        |        |        |        |        |
|                                                                        | Age    | Gender | Occupation | O      | E      | C      | N      | A      | Sleep  |
| Sleep                                                                  | 0.854  | 0.005  | 0.908      | 0.368  | 0.304  | 0.407  | 0.002  | 0.548  | ...    |
| Fear                                                                   | 0.482  | 0.055  | 0.012      | 0.627  | 0.747  | 0.845  | 0.081  | 0.071  | 0.765  |
| Somatic_Concern                                                        | 0.476  | 0.002  | 0.003      | 0.130  | 0.095  | 0.062  | 0.007  | 0.004  | 0.003  |

**Table S5.** Standardized indirect effects for Model 1

| lower bounds (BC)                                                        |        |        |            |        |        |        |        |        |       |
|--------------------------------------------------------------------------|--------|--------|------------|--------|--------|--------|--------|--------|-------|
|                                                                          | Age    | Gender | Occupation | O      | E      | C      | N      | A      | Sleep |
| Sleep                                                                    | 0.000  | 0.000  | 0.000      | 0.000  | 0.000  | 0.000  | 0.000  | 0.000  | 0.000 |
| Fear                                                                     | -0.008 | -0.026 | -0.012     | -0.018 | -0.022 | -0.016 | -0.028 | -0.017 | 0.000 |
| Somatic_Concern                                                          | -0.040 | -0.097 | -0.040     | -0.060 | -0.072 | -0.064 | 0.038  | -0.049 | 0.000 |
| upper bounds (BC)                                                        |        |        |            |        |        |        |        |        |       |
|                                                                          | Age    | Gender | Occupation | O      | E      | C      | N      | A      | Sleep |
| Sleep                                                                    | 0.000  | 0.000  | 0.000      | 0.000  | 0.000  | 0.000  | 0.000  | 0.000  | 0.000 |
| Fear                                                                     | 0.015  | 0.015  | 0.006      | 0.006  | 0.007  | 0.007  | 0.036  | 0.005  | 0.000 |
| Somatic_Concern                                                          | 0.049  | -0.011 | 0.040      | 0.020  | 0.019  | 0.027  | 0.124  | 0.024  | 0.000 |
| Standardized indirect effects for Model 1 - two tailed significance (BC) |        |        |            |        |        |        |        |        |       |
|                                                                          | Age    | Gender | Occupation | O      | E      | C      | N      | A      | Sleep |
| Sleep                                                                    | ...    | ...    | ...        | ...    | ...    | ...    | ...    | ...    | ...   |
| Fear                                                                     | 0.720  | 0.623  | 0.680      | 0.451  | 0.496  | 0.561  | 0.723  | 0.546  | ...   |
| Somatic_Concern                                                          | 0.846  | 0.005  | 0.916      | 0.340  | 0.299  | 0.390  | 0.002  | 0.541  | ...   |

**Table S6.** Model Fit Summary for Model 1

| CMIN                 |        |         |        |        |         |
|----------------------|--------|---------|--------|--------|---------|
| Model                | NPAR   | CMIN    | DF     | P      | CMIN/DF |
| Default model        | 77     | 0       | 0      |        |         |
| Saturated model      | 77     | 0       | 0      |        |         |
| Independence model   | 22     | 448.572 | 55     | 0      | 8.156   |
| Baseline Comparisons |        |         |        |        |         |
| Model                | NFI    | RFI     | IFI    | TLI    | CFI     |
|                      | Delta1 | rho1    | Delta2 | rho2   |         |
| Default model        | 1      |         | 1      |        | 1       |
| Saturated model      | 1      |         | 1      |        | 1       |
| Independence model   | 0      | 0       | 0      | 0      | 0       |
| RMSEA                |        |         |        |        |         |
| Model                | RMSEA  | LO 90   | HI 90  | PCLOSE |         |
| Independence model   | 0.156  | 0.143   | 0.169  | 0      |         |

**Table S7.** Standardized total effects for Model 2

| lower bounds (BC)                                                     |        |        |            |        |        |        |
|-----------------------------------------------------------------------|--------|--------|------------|--------|--------|--------|
|                                                                       | Age    | Gender | Occupation | N      | Sleep  | A      |
| Sleep                                                                 | -0.101 | 0.026  | -0.128     | -0.364 | 0.000  | 0.000  |
| Fear                                                                  | -0.076 | -0.219 | -0.270     | 0.017  | 0.000  | 0.000  |
| Somatic_Concern                                                       | -0.128 | -0.309 | -0.246     | 0.197  | -0.455 | -0.235 |
| upper bounds (BC)                                                     |        |        |            |        |        |        |
|                                                                       | Age    | Gender | Occupation | N      | Sleep  | A      |
| Sleep                                                                 | 0.125  | 0.243  | 0.106      | -0.142 | 0.000  | 0.000  |
| Fear                                                                  | 0.161  | 0.015  | -0.042     | 0.247  | 0.000  | 0.000  |
| Somatic_Concern                                                       | 0.094  | -0.128 | -0.050     | 0.413  | -0.249 | -0.058 |
| Standardized total effects for Model 2 - two tailed significance (BC) |        |        |            |        |        |        |
|                                                                       | Age    | Gender | Occupation | N      | Sleep  | A      |
| Sleep                                                                 | 0.892  | 0.009  | 0.963      | 0.002  | ...    | ...    |
| Fear                                                                  | 0.513  | 0.069  | 0.012      | 0.020  | ...    | ...    |
| Somatic_Concern                                                       | 0.798  | 0.002  | 0.007      | 0.002  | 0.003  | 0.002  |

**Table S8.** Standardized direct effects for Model 2

| lower bounds (BC)                                                      |        |        |            |        |        |        |
|------------------------------------------------------------------------|--------|--------|------------|--------|--------|--------|
|                                                                        | Age    | Gender | Occupation | N      | Sleep  | A      |
| Sleep                                                                  | -0.101 | 0.026  | -0.128     | -0.364 | 0.000  | 0.000  |
| Fear                                                                   | -0.076 | -0.219 | -0.270     | 0.017  | 0.000  | 0.000  |
| Somatic_Concern                                                        | -0.115 | -0.257 | -0.244     | 0.099  | -0.455 | -0.235 |
| upper bounds (BC)                                                      |        |        |            |        |        |        |
|                                                                        | Age    | Gender | Occupation | N      | Sleep  | A      |
| Sleep                                                                  | 0.125  | 0.243  | 0.106      | -0.142 | 0.000  | 0.000  |
| Fear                                                                   | 0.161  | 0.015  | -0.042     | 0.247  | 0.000  | 0.000  |
| Somatic_Concern                                                        | 0.085  | -0.085 | -0.050     | 0.324  | -0.249 | -0.058 |
| Standardized direct effects for Model 2 - two tailed significance (BC) |        |        |            |        |        |        |
|                                                                        | Age    | Gender | Occupation | N      | Sleep  | A      |
| Sleep                                                                  | 0.892  | 0.009  | 0.963      | 0.002  | ...    | ...    |
| Fear                                                                   | 0.513  | 0.069  | 0.012      | 0.020  | ...    | ...    |
| Somatic_Concern                                                        | 0.805  | 0.002  | 0.005      | 0.003  | 0.003  | 0.002  |

**Table S9.** Standardized indirect effects for Model 2

| lower bounds (BC)                                                        |        |        |            |       |       |       |
|--------------------------------------------------------------------------|--------|--------|------------|-------|-------|-------|
|                                                                          | Age    | Gender | Occupation | N     | Sleep | A     |
| Sleep                                                                    | 0.000  | 0.000  | 0.000      | 0.000 | 0.000 | 0.000 |
| Fear                                                                     | 0.000  | 0.000  | 0.000      | 0.000 | 0.000 | 0.000 |
| Somatic_Concern                                                          | -0.046 | -0.099 | -0.037     | 0.050 | 0.000 | 0.000 |
| Standardized indirect effects for Model 2 - upper bounds (BC)            |        |        |            |       |       |       |
|                                                                          | Age    | Gender | Occupation | N     | Sleep | A     |
| Sleep                                                                    | 0.000  | 0.000  | 0.000      | 0.000 | 0.000 | 0.000 |
| Fear                                                                     | 0.000  | 0.000  | 0.000      | 0.000 | 0.000 | 0.000 |
| Somatic_Concern                                                          | 0.038  | -0.009 | 0.044      | 0.140 | 0.000 | 0.000 |
| Standardized indirect effects for Model 2 - two tailed Significance (BC) |        |        |            |       |       |       |
|                                                                          | Age    | Gender | Occupation | N     | Sleep | A     |
| Sleep                                                                    | ...    | ...    | ...        | ...   | ...   | ...   |
| Fear                                                                     | ...    | ...    | ...        | ...   | ...   | ...   |
| Somatic_Concern                                                          | 0.892  | 0.008  | 0.967      | 0.002 | ...   | ...   |

**Table S10.** Model fit summary for Model 2

| Model              | NPAR          | CMIN        | DF            | P           | CMIN/DF |
|--------------------|---------------|-------------|---------------|-------------|---------|
| Default model      | 41            | 4.547       | 3             | 0.208       | 1.516   |
| Saturated model    | 44            | 0.000       | 0             |             |         |
| Independence model | 16            | 329.380     | 28            | 0.000       | 11.764  |
| Model              | NFI<br>Delta1 | RFI<br>rho1 | IFI<br>Delta2 | TLI<br>rho2 | CFI     |
| Default model      | 0.986         | 0.871       | 0.995         | 0.952       | 0.995   |
| Saturated model    | 1.000         |             | 1.000         |             | 1.000   |
| Independence model | 0.000         | 0.000       | 0.000         | 0.000       | 0.000   |
| Model              | RMSEA         | LO 90       | HI 90         | PCLOSE      |         |
| Default model      | 0.042         | 0.000       | 0.114         | 0.477       |         |
| Independence model | 0.191         | 0.173       | 0.210         | 0.000       |         |
